# Supplementary material
Source: publisher figshare collection journal article supplement (https://tandf.figshare.com/ndownloader/files/14813534)

**Supplemental data**

First plan of a principal coordinates analysis on the 145 individuals of *Dianthus superbus* from 30 populations (colours), using 272 AFLP markers, and explaining 3.41% and 3.30% of the total inertia.


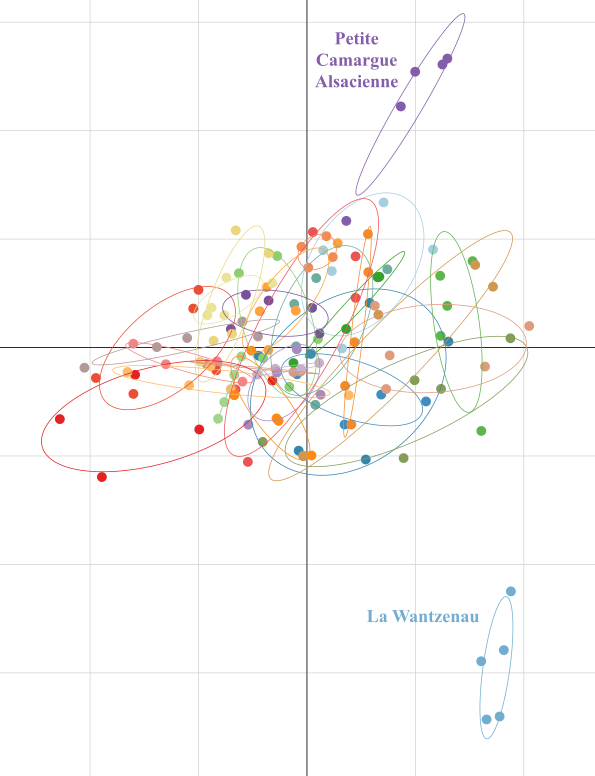

Supplement: Supplementary file 1 [file 14813534]
